# Supplementary material for: The Luna Analog Facility testbeds (ESA, EAC): contemporary characterization work of highland (lunar) and mare (EAC-1) lunar regolith simulants
Source: Frontiers journal article supplement (doi:10.3389/frspt.2024.1510635), 2024-12-18
Supplement: Data_Sheet_1.xls [file Data_Sheet_1.xls]

## Sheet: Whole Rock XRD
X-ray Diffraction Analysis											Client:	European Space Agency
Size Fraction : Whole Rock											Project:	Lunar simulants
Weight % by mineral phase
Sample ID		XMS Lab ID ESA11224	Sample name	Smectite	Muscovite	Biotite	Kaolinite	Chlorite	Quartz	Nepheline	Plagioclase	Analcime	Ilmenite	Forsterite	Clinozoisite	Serpentine	Clynpyroxene	Amphibole	Apatite	Magnetite	Amorphous	Total
Lumina-1		573	Greenspar 0-90µn	0	2.7	1.27	0	0.94	4.5	0	84.89	0	0	0	5.39	0	0	0.31	0	0	0	100
Lumina-2		574	Greenspar 0-250µn	0	3	0.39	0	2.66	4.69	0	84.9	0	0	0	4.36	0	0	TR	0	0	0	100
Lumina-3		575	Greenspar 0-2000µn	0	1.34	1.63	0	0.69	3.35	0	87.8	0	0	0	5.19	0	0	TR	0	0	0	100
EAC-7		579	EAC-1	1.6	0	3.11	0	3.55	0.33	9.52	12.54	3.32	0.55	13.92	0	0.68	32.62	0	1.79	1.96	14.4	99.89
Note:
1) Quantification with the Rieveld method (Autoquan software)
2) Plagioclase in the Lumina and Exolith sample appear to be bytownite An85.
3) Plagioclase in the EAC-1 sample appear to be andesine An50

## Sheet: <2 micron clay XRD
X-Ray Diffraction Analysis
Size Fraction : <2 micron clay
Sample ID	Sample name	XMS Lab ID ESA11224	Wt. %	Smectite			Illite/smectite				Mica			Kaolinite			Chlorite			Quartz		Plagioclase		Pyroxene		Serpentine
			<2um	% A	% B	Crys	% A	% B	Order	% Illite	% A	% B	Crys	% A	% B	Crys	% A	% B	Crys	% A	% B	% A	% B	% A	% B	% A	% B
Lumina-1	Greenspar 0-90µn	573	1.85356	0	0		0	0			31.8013	0.589456	P	0	0		16.8654	0.31261	P	4.13333	0.0766139	47.2	0.874881	0	0	0	0
Lumina-2	Greenspar 0-250µn	574	2.01141	0	0		0	0			28.9974	0.583255	P	0	0		10.616	0.213531	P	4.86667	0.0978885	55.52	1.11673	0	0	0	0
Lumina-3	Greenspar 0-2000µn	575	3.53409	0	0		0	0			18.9339	0.669142	P	0	0		7.30938	0.25832	P	6.11667	0.216168	67.64	2.39046	0	0	0	0
EAC-7	EAC-1	579	2.55746	62.3159	1.5937	M	0	0			7.29229	0.186497	P	0	0		10.2092	0.261096	P	0	0	9.84	0.251654	2.67593	0.0684357	7.66667	0.196072
A = Weight % relevant size fraction									Mixed-layer Ordering:							Crystallinity:
B = Weight % bulk sample									R I = Randomly Interstratified (R0)							VW = Very Well Crystallised
									O = Ordered Interstratification (R1)							W = Well Crystallised
									LR = Long-range Ordering (R3)							M = Moderately Crystallised
																P = Poorly Crystallised

## Sheet: XRF and ICP
	XRF Major Element fused bead method																		XRF Trace Element pressed pellet method
	Sample ID	Sample name	Lab ID	Na2O	MgO	Al2O3	SiO2	P2O5	SO3	K2O	CaO	TiO2	Mn2O3	Fe2O3	FeO	LOI			V	Cr	Co	Ni	Cu	Zn	Ga	Ge	As	Se	Br	Rb	Sr	Y	Zr	Nb	Mo	Sn	Sb	Cs	Ba	La	Ce	Pr	Nd	Sm	Eu	Gd	Tb	Dy	Ho
			ESA11224	mass%	mass%	mass%	mass%	mass%	mass%	mass%	mass%	mass%	mass%	mass%	mass%	mass%			ppm	ppm	ppm	ppm	ppm	ppm	ppm	ppm	ppm	ppm		ppm	ppm	ppm	ppm	ppm	ppm	ppm	ppm	ppm	ppm	ppm	ppm		ppm
	Lumina-1	Greenspar 0-90µn	573	2.41946	0.357083	30.0909	48.9965	0.0375877	0.0148372	0.284875	14.9935	0.0999041	0.0237396	0.878365	0.790529	1.08505			ND	ND	19	ND	ND	22	18	ND	ND	ND		ND	246	ND	60	ND	ND	ND	ND	ND	157	ND	10		22
	Lumina-2	Greenspar 0-250µn	574	2.52246	0.104234	30.4521	49.7959	<0.01	<0.01	0.184643	14.8766	0.0486424	0.0178686	0.420906	0.378815	0.729803			ND	ND	15	ND	ND	15	18	ND	ND	ND		ND	256	ND	57	ND	ND	ND	ND	ND	121	ND	ND		26
	Lumina-3	Greenspar 0-2000µn	575	2.34406	0.14396	31.2124	48.4042	0.016878	<0.01	0.180694	15.5208	0.0486484	0.0178709	0.652286	0.587058	0.717458			ND	ND	19	ND	ND	19	19	ND	ND	ND		ND	242	ND	45	ND	ND	ND	ND	ND	106	ND	ND		18
	EAC-7	EAC-1	579	2.92055	13.8439	11.2185	42.3285	0.65464	0.0194833	0.984882	10.4362	2.09641	0.242567	12.2268	11.0041	2.5834			227	430	60	376	67	116	18	ND	ND	ND		38	807	31	233	103	ND	ND	ND	ND	635	62	112		55
	ICP-OES																ICP-MS
	Sample ID	Sample name	Lab ID	Na2O	MgO	Al2O3	SiO2	P2O5	S	K2O	CaO	TiO2	MnO	Fe2O3			Be	Sc	V	Cr	Co	Ni	Cu	Zn	Ga	Ge	As	Se	Br	Rb	Sr	Y	Zr	Nb	Mo	Sn	Sb	Cs	Ba	La	Ce	Pr	Nd	Sm	Eu	Gd	Tb	Dy	Ho
			ESA11224	mass%	mass%	mass%	mass%	mass%	ppm	mass%	mass%	mass%	mass%	mass%
	Lumina-1	Greenspar 0-90µn	573	2.37776	0.422135	30.2568	49.4347	0.0879904	972.39	0.271925	15.3826	0.0942401	0.0128879	1.01225			0.375311	1.09537	11.8004	18.1088	3.92346	16.2358	7.42918	8.28115	19.39					6.9461	249.591	6.80072	12.2309	0.85668	1.77425	0.321989		0.165887	122.184	15.0732	25.0103	2.64459	8.90749	1.31752	0.338343	1.3904	0.18853	1.01761	0.228605
	Lumina-2	Greenspar 0-250µn	574	2.44323	0.204294	30.654	49.7927	0.0519062	600.068	0.186589	15.1065	0.0314608	0.00744865	0.584214			0.376644	0.503633	6.18542	3.25304	4.84017	68.3898	5.33595	3.48069	19.019					4.03584	260.258	5.41997	10.344	0.553413	0.454849	0.300701		0.152509	97.1069	18.4458	31.5571	3.18414	10.8207	1.44583	0.292944	1.41417	0.17952	0.84928	0.177619
	Lumina-3	Greenspar 0-2000µn	575	2.17742	0.257959	31.4714	49.0439	0.0439776	380.546	0.19117	15.8953	0.0425165	0.00956199	0.742946			0.37298	0.731678	8.74352	3.58612	2.33124	4.87666	4.11417	5.23904	19.8349					5.03227	250.087	3.79181	5.29845	0.448177	0.199666	0.332634		0.143144	84.9941	8.11869	13.638	1.46158	4.97632	0.810625	0.279688	0.768484	0.110782	0.584816	0.131298
	EAC-7	EAC-1	579	2.82285	13.1374	11.2138	42.1343	0.665795	1341.77	0.953607	10.4556	2.11729	0.199312	12.1675			1.50524	22.4904	211.884	405.68	59.4643	348.207	54.4051	107.916	18.095					32.6025	798.321	24.5314	213.413	80.036	3.35552	1.64986		0.836457	547.16	62.5909	117.081	13.5181	51.2773	8.83301	2.73624	8.05654	1.10548	5.33021	1.00873
	Calculated chemical analysis from XRD data - Mass Balance
	Sample ID	Sample name	Lab ID	Na2O	MgO	Al2O3	SiO2	P2O5	SO3	K2O	CaO	TiO2	Mn2O3	Fe2O3
			ESA11224	mass%	mass%	mass%	mass%	mass%	mass%	mass%	mass%	mass%	mass%	mass%
	Lumina-1	Greenspar 0-90µn	573	2.1982	0.401915	28.4137	48.3248	0	0	0.552577	13.0913	0.073934	0.005075	1.11636
	Lumina-2	Greenspar 0-250µn	574	2.19301	0.592745	28.7225	48.6159	0	0	0.513405	13.0625	0.061754	0.009544	1.24392
	Lumina-3	Greenspar 0-2000µn	575	2.2636	0.349981	28.9671	47.8548	0	0	0.434217	13.5075	0.068912	0.003393	1.01338
	EAC-7	EAC-1	579	3.2134	14.4362	13.759	40.589	0.912485	0	1.24715	11.3258	2.47699	0.049796	6.35923
[truncated: 12 more columns]

## Sheet: Triplicate ICP
Depth		Al2O3	SiO2	TiO2	Fe2O3	MnO	MgO	CaO	Na2O	K2O	P2O5	Total	Ba	Ce	Cr	Cu	La	Nb	Ni	S	Sc	Sr	Th	V	Y	U	Zn	Zr		S raw		Depth	Be	V	Cr	Co	Ni	Cu	Zn	Ga	Rb	Sr	Y	Zr	Nb	Mo	Sn	Cs	Ba
Lumina-1A		30.2929	49.5956	0.094489	1.00827	0.012784	0.426597	15.2741	2.41494	0.275011	0.0874266	99.4822	124.83	19.4336	16.0064	10.3186	16.0075	2.69233	17.0321	106.535	1.04929	257.22	1.07176	11.1969	6.6372	3.04845	11.7156	13.2927		941.552		Lumina-1A	0.439584	12.0149	18.1071	3.94731	15.7886	7.88239	8.00965	19.4201	6.98362	249.41	6.87608	12.2219	0.868448	1.80702	0.360242	0.172576	125.736
Lumina-1B		30.0172	49.3001	0.0938491	1.01424	0.0129918	0.415969	15.4615	2.33105	0.26819	0.088378	99.0034	122.133	14.1469	16.2126	9.37793	14.7673	1.55625	16.2066	111.701	1.14145	252.035	1.62253	10.6396	6.62152	2.9416	11.826	12.4895		987.208		Lumina-1B	0.388632	11.6065	17.8628	3.84956	15.9017	7.28226	8.17775	19.4964	6.9129	248.585	6.75404	12.1889	0.858361	1.77793	0.31833	0.165552	119.986
Lumina-1C		30.4603	49.4084	0.0943823	1.01424	0.0128879	0.423841	15.4122	2.3873	0.272575	0.0881666	99.5743	123.897	19.5357	15.9549	9.95289	15.5556	3.41152	16.729	111.837	1.09537	256.123	1.15789	10.892	6.77723	3.41479	12.1171	11.6362		988.409		Lumina-1C	0.297718	11.7797	18.3564	3.97351	17.0172	7.12289	8.65603	19.2535	6.94178	250.779	6.77205	12.2819	0.843231	1.73779	0.287395	0.159532	120.831
Lumina-1	Average	30.2568	49.4347	0.0942401	1.01225	0.0128879	0.422135	15.3826	2.37776	0.271925	0.0879904	99.3533	123.62	17.7054	16.058	9.88313	15.4435	2.55337	16.6559	110.024	1.09537	255.126	1.28406	10.9095	6.67865	3.13495	11.8862	12.4728		972.39		#DIV/0!	0.375311	11.8004	18.1088	3.92346	16.2358	7.42918	8.28115	19.39	6.9461	249.591	6.80072	12.2309	0.85668	1.77425	0.321989	0.165887	122.184
Lumina-1	STD DEV	0.182715	0.122085	0.000279912	0.00281245	8.48623e-05	0.00450339	0.0792949	0.0349045	0.00282258	0.000407915	0.250278	1.11866	2.51657	0.111326	0.387172	0.512495	0.76376	0.340946	2.46789	0.0376215	2.23079	0.241903	0.227819	0.0700028	0.202628	0.169379	0.676396		21.8111		#DIV/0!	0.0586774	0.167343	0.201531	0.0533393	0.554462	0.327004	0.273822	0.101414	0.0290333	0.904864	0.0537895	0.0384806	0.0103629	0.0283828	0.0298519	0.00533024	2.53477
Lumina-2A		30.6277	49.8715	0.0317807	0.590545	0.0074833	0.206656	15.1952	2.46921	0.188961	0.0514834	99.2406	101.39	26.3766	1.82945	7.85599	18.8349	2.46424	75.5889	63.7579	0.574075	265.594	0.493989	5.71513	5.50539	3.2229	5.56163	9.49165		563.489		Lumina-2A	0.358661	6.24613	3.20617	4.87645	68.4034	5.53028	3.00675	18.9153	3.99035	260.292	5.44765	10.4296	0.575939	0.441472	0.309349	0.167559	98.046
Lumina-2B		30.6179	50.0193	0.0314608	0.584778	0.0074833	0.206164	15.0868	2.4781	0.188473	0.052752	99.2731	101.172	35.3276	1.29762	7.98176	18.7928	3.59487	76.0277	69.7394	0.486005	265.893	0	5.39552	5.40507	3.3461	5.2715	10.1603		616.354		Lumina-2B	0.361658	6.17007	3.33182	4.79784	67.6925	5.25089	3.62711	18.7537	4.03518	259.862	5.38963	10.3277	0.566861	0.459532	0.314339	0.145485	96.22
Lumina-2C		30.7164	49.4873	0.0311408	0.57732	0.00737936	0.200062	15.0375	2.38237	0.182334	0.0514834	98.6732	98.1626	24.516	0	7.14997	18.2883	0.645527	75.5157	70.1926	0.450819	259.214	0.681335	4.79204	5.52525	3.10624	5.07072	9.9073		620.359		Lumina-2C	0.409612	6.14005	3.22113	4.84622	69.0734	5.22668	3.80821	19.388	4.082	260.619	5.42264	10.2747	0.517437	0.463545	0.278414	0.144482	97.0547
Lumina-2	Average	30.654	49.7927	0.0314608	0.584214	0.00744865	0.204294	15.1065	2.44323	0.186589	0.0519062	99.0623	100.241	28.7401	1.04236	7.66257	18.6387	2.23488	75.7108	67.8966	0.503633	263.567	0.391775	5.30089	5.47857	3.22508	5.30128	9.85308		600.068		#DIV/0!	0.376644	6.18542	3.25304	4.84017	68.3898	5.33595	3.48069	19.019	4.03584	260.258	5.41997	10.344	0.553413	0.454849	0.300701	0.152509	97.1069
Lumina-2	STD DEV	0.0442863	0.224231	0.00026123	0.00541371	4.89953e-05	0.00299887	0.0659017	0.043186	0.00301561	0.000598016	0.275471	1.47261	4.71961	0.768372	0.366081	0.248329	1.21494	0.226102	2.93238	0.0518397	3.08078	0.287391	0.382741	0.0526027	0.0979361	0.201516	0.275655		25.9162		#DIV/0!	0.0233445	0.0446486	0.0560417	0.0323734	0.563828	0.137766	0.343187	0.269131	0.0374151	0.310008	0.0237605	0.0642969	0.0257068	0.00960047	0.01589	0.01065	0.746382
Lumina-3A		31.3663	48.9552	0.0423387	0.744172	0.00956199	0.255958	15.9348	2.14946	0.188863	0.0417576	99.6885	83.7288	4.26563	0.962447	3.68755	7.69791	0	3.32909	40.5295	0.722882	245.854	0.826363	7.61386	3.73506	2.7508	8.36152	4.75888		358.198		Lumina-3A	0.350668	8.70716	3.6659	2.31175	4.89969	4.11619	5.07295	19.7954	4.99741	249.912	3.77614	5.39274	0.45591	0.201672	0.332301	0.142475	84.3848
Lumina-3B		31.8095	49.3198	0.0427653	0.743675	0.00956199	0.260288	15.8066	2.20571	0.19471	0.044929	100.438	85.8145	7.41154	1.71505	4.4295	8.9865	0.687325	2.33329	41.6987	0.764351	249.045	0.399891	7.75895	3.83852	3.15639	7.90474	4.01593		368.531		Lumina-3B	0.340678	8.66912	3.61504	2.2271	4.45509	4.08694	5.69331	20.3193	4.97948	251.049	3.80215	5.26979	0.443806	0.222742	0.291387	0.134449	84.6673
Lumina-3C		31.2383	48.8567	0.0424454	0.74099	0.00956199	0.257631	15.9446	2.17709	0.189935	0.0452462	99.5026	84.8598	0	0.766412	5.05307	7.21127	1.06722	2.59974	46.9461	0.707802	246.552	0.283252	7.46667	3.9681	3.61322	7.68288	4.50788		414.908		Lumina-3C	0.427595	8.85428	3.47742	2.45485	5.27521	4.13939	4.95088	19.39	5.11993	249.301	3.79715	5.23281	0.444815	0.174582	0.374213	0.152509	85.9303
Lumina-3	Average	31.4714	49.0439	0.0425165	0.742946	0.00956199	0.257959	15.8953	2.17742	0.19117	0.0439776	99.8762	84.801	3.89239	1.14797	4.39004	7.96522	0.584848	2.75404	43.0581	0.731678	247.15	0.503169	7.61316	3.84723	3.17347	7.98305	4.42756		380.546		#DIV/0!	0.37298	8.74352	3.58612	2.33124	4.87666	4.11417	5.23904	19.8349	5.03227	250.087	3.79181	5.29845	0.448177	0.199666	0.332634	0.143144	84.9941
Lumina-3	STD DEV	0.244733	0.199166	0.000181265	0.0013976	0	0.00178284	0.0628817	0.0229664	0.00254167	0.00157512	0.404106	0.852496	3.03724	0.408894	0.55817	0.748978	0.441675	0.42092	2.79036	0.0239092	1.36941	0.233441	0.119322	0.095341	0.352288	0.282532	0.308578		24.6611		#DIV/0!	0.0388334	0.0798417	0.079618	0.0939932	0.335209	0.0214594	0.325056	0.380432	0.0624131	0.724336	0.0112679	0.068364	0.00548353	0.0197126	0.0338143	0.00738822	0.671926
EAC-7A		11.1776	42.2656	2.1116	12.151	0.198827	13.1079	10.5016	2.81561	0.950748	0.66643	95.9469	567.807	104.156	410.931	56.6185	63.6938	80.0824	366.973	143.467	22.4834	800.771	17.0546	217.839	24.9875	7.99618	111.835	220.776		1267.95		EAC-7A	1.52056	211.832	405.773	59.8032	347.894	54.6179	108.219	17.9618	32.5036	791.235	24.4364	213.45	80.3662	3.36321	1.70841	0.820738	547.468
EAC-7B		11.0693	42.0883	2.10307	12.1311	0.198931	12.9898	10.4819	2.77515	0.939834	0.661355	95.4387	563.968	109.908	410.725	55.0226	63.1052	81.2938	366.555	159.145	22.2635	793.992	18.1392	217.524	24.6635	7.85663	111.032	220.675		1406.52		EAC-7B	1.52955	211.977	405.97	59.0585	349.334	54.3466	107.792	18.3051	32.4259	804.243	24.6144	214.01	79.8871	3.35518	1.62658	0.862879	548.665
EAC-7C		11.3943	42.0489	2.1372	12.2206	0.200178	13.3145	10.3833	2.87779	0.970239	0.669601	96.2166	579.014	117.078	411.24	57.0307	66.5001	81.01	365.092	152.847	22.7242	815.028	19.0429	219.732	25.1651	7.99945	112.437	224.992		1350.85		EAC-7C	1.46561	211.842	405.297	59.5312	347.392	54.2508	107.738	18.018	32.8781	799.485	24.5434	212.779	79.8548	3.34816	1.6146	0.825755	545.346
EAC-7	Average	11.2138	42.1343	2.11729	12.1675	0.199312	13.1374	10.4556	2.82285	0.953607	0.665795	95.8674	570.263	110.381	410.965	56.2239	64.433	80.7954	366.207	151.82	22.4904	803.263	18.0789	218.365	24.9387	7.95076	111.768	222.148		1341.77		#DIV/0!	1.50524	211.884	405.68	59.4643	348.207	54.4051	107.916	18.095	32.6025	798.321	24.5314	213.413	80.036	3.35552	1.64986	0.836457	547.16
EAC-7	STD DEV	0.135111	0.0942698	0.0145012	0.0383681	0.000613909	0.13421	0.0517618	0.0422128	0.0125764	0.00339608	0.322507	6.38327	5.28584	0.211784	0.86599	1.48126	0.517309	0.806381	6.44196	0.188172	8.76696	0.812834	0.97498	0.207673	0.0665722	0.575727	2.01186		56.9338		#DIV/0!	0.0282614	0.0661772	0.282637	0.307683	0.82328	0.155487	0.215275	0.150319	0.197433	5.37367	0.0731841	0.503419	0.233833	0.00614875	0.0416842	0.0187947	1.37211
[truncated: 21 more columns]
